# Supplementary material for: Bronchogenic Cyst Mimicking Cor Triatriatum in an Infant: The Definitive Role of Cardiac Computed Tomography: A Case Report
Source: Research Square preprint supplement (doi:10.21203/rs.3.rs-7842446/v1), 2025-10-29
Supplement: Supplementary file 1 [file e4988a061075e85c93c3d58c.pdf]

## CARE Checklist (for Case Reports)

**Manuscript Title:** *Bronchogenic Cyst Mimicking Cor Triatriatum in an Infant: The Definitive Role of Cardiac Computed Tomography — A Case Report*

**Corresponding Author:** Özgür Genç ([drozgurgenc@gmail.com](mailto:drozgurgenc@gmail.com))

| CARE Item                                               | Page / Line (approx.) | Reported?       | Notes / Description                                                                                            |
|---------------------------------------------------------|-----------------------|-----------------|----------------------------------------------------------------------------------------------------------------|
| 1. Title                                                | p.1, L1               | ✓ Yes           | Title includes “A Case Report.”                                                                                |
| 2. Keywords                                             | p.1, L6               | ✓ Yes           | “bronchogenic cyst; cor triatriatum; pediatric cardiac CT; echocardiography; diagnostic imaging; case report.” |
| 3a. Abstract: Background                                | p.1, L9–13            | ✓ Yes           | Provides clinical context and rationale.                                                                       |
| 3b. Abstract: Case Presentation                         | p.1, L13–19           | ✓ Yes           | Summarizes patient data and presentation.                                                                      |
| 3c. Abstract: Diagnosis/Treatment                       | p.1, L18–22           | ✓ Yes           | Describes diagnostic process and surgical management.                                                          |
| 3d. Abstract: Conclusion                                | p.1, L22              | ✓ Yes           | Concludes with clinical significance.                                                                          |
| 4. Introduction                                         | p.2, L25–41           | ✓ Yes           | Highlights rarity and literature context.                                                                      |
| 5a. Patient Information (Demographics, Chief Complaint) | p.2–3, L42–49         | ✓ Yes           | 6.5-month-old female, respiratory distress, feeding difficulty.                                                |
| 5b–5d. Medical, Family, Psychosocial History            | p.3, L49              | ✓ Yes (revised) | “There was no relevant family or psychosocial history contributing to the present condition.”                  |
| 6. Physical Examination                                 | p.3, L48–50           | ✓ Yes           | Murmur, oxygen saturation, and clinical findings described.                                                    |

| CARE Item                                             | Page / Line (approx.)      | Reported?       | Notes / Description                                                                                                                                       |
|-------------------------------------------------------|----------------------------|-----------------|-----------------------------------------------------------------------------------------------------------------------------------------------------------|
| 7. Timeline                                           | p.5, L85–87                | ✓ Yes (revised) | “The clinical course included initial echocardiographic misdiagnosis, subsequent CT confirmation, and staged surgical correction with complete recovery.” |
| 8a. Diagnostic Assessment (Methods)                   | p.3–4, L51–85              | ✓ Yes           | Echocardiography and CT imaging findings detailed.                                                                                                        |
| 8b. Diagnostic Challenges                             | p.4, L60–70                | ✓ Yes           | Misdiagnosis and differentiation described.                                                                                                               |
| 8c. Diagnostic Reasoning                              | p.4, L70–85                | ✓ Yes           | Cor triatriatum excluded; diagnosis of bronchogenic cyst confirmed.                                                                                       |
| 8d. Prognostic Characteristics                        | p.6, L98–106               | ✓ Yes           | Full recovery noted.                                                                                                                                      |
| 9a. Therapeutic Intervention (Type, Dosage, Duration) | p.5, L86–95                | ✓ Yes           | Two-stage surgical approach described.                                                                                                                    |
| 9b. Changes to Intervention                           | p.5, L95–97                | ✓ Yes           | Adjustment after first surgery due to persistent symptoms.                                                                                                |
| 10a. Follow-up & Outcomes                             | p.6, L98–106               | ✓ Yes           | Complete clinical recovery, no complications.                                                                                                             |
| 10b. Clinician & Patient-Reported Outcomes            | p.8, “Patient Perspective” | ✓ Yes           | Parents’ satisfaction with CT diagnosis and surgical results.                                                                                             |
| 11. Discussion                                        | p.6–8                      | ✓ Yes           | Compares findings with literature, highlights learning points.                                                                                            |
| 12. Patient Perspective                               | p.8, L107–110              | ✓ Yes (added)   | “The parents expressed satisfaction with the diagnostic clarity provided by cardiac CT                                                                    |

| CARE Item                   | Page / Line (approx.)                                 | Reported?                               | Notes / Description                                                                                    |
|-----------------------------|-------------------------------------------------------|-----------------------------------------|--------------------------------------------------------------------------------------------------------|
|                             |                                                       |                                         | and the successful surgical outcome.”                                                                  |
| <b>13. Informed Consent</b> | p.9, Statements & Declarations → “Consent to Publish” | <input checked="" type="checkbox"/> Yes | “Written informed consent for publication (including images) was obtained from the patient’s parents.” |

---

### Completion Note

All CARE checklist items have been addressed in the manuscript.  
Line and page numbers correspond to the most recent version of the manuscript uploaded to the submission system.

---

### Signature:

Dr. Özgür Genç  
Department of Radiology, Istanbul Aydın University  
E-mail: [drozgurgenc@gmail.com](mailto:drozgurgenc@gmail.com)

---
